# Supplementary material for: Thermotropic liquid-crystalline folic acid derivatives: supramolecular discotic and smectic aggregation
Source: Royal Society of Chemistry journal article supplement (doi:10.1039/b004815l), 2000-01-01
Supplement: b004815l.doc [file b004815l.doc]

**Supplementary data**

**Thermotropic liquid-crystalline folic acid derivatives: supramolecular discotic and smectic aggregation**

**Kiyoshi Kanie, Takayasu Yasuda, Seiji Ujiie, and Takashi Kato***

1. Synthesis of thermotropic liquid-crystalline folic acid derivatives **1**.

Synthesis of bis[2-(3,4-dialkyloxyphenyl)ethyl] L-glutamate **2** was carried out by esterification of *Z*-L-glutamic acid followed by deprotection of the *Z*-group (eq. 1)

Representative procedure for the preparation of bis[2-(3,4-diundecyloxyphenyl)-ethyl] L-glutamate (**2b**) was as follows: To a mixture of 2-(3,4-diundecyloxyphenyl)-ethanol (8.5 g, 18 mmol), *N*-benzyloxycarbonyl-L-glutamic acid (2.5 g, 8.8 mmol), and 4-(*N,N*-dimethylamino)pyridine (DMAP, 0.43 g, 3.5 mmol) in CH2Cl2 (80 mL) was added 1-ethyl-3-(3-dimethylaminopropyl)carbodiimide hydrochloride (EDC, 4.5 g, 24 mmol) in portionwise at room temperature. The reaction mixture was stirred overnight and the resulting mixture was poured into an aq. NH4Cl solution, and extracted three times with diethyl ether. The combined organic extracts were washed with sat. aq. NaCl, dried over MgSO4, filtered, and evaporated under reduced pressure. The residue was purified by flash column chromatography on silica gel (eluent: hexane/EtOAc = 5/1, *Rf* = 0.39) to give *N*-benzyloxycarbonyl-bis[2-(3,4-diundecyloxyphenyl)ethyl] L-glutamate (**3b**) as a colorless solid in a yield of 77% (7.9 g, 6.7 mmol). A suspension of **3b** (7.5 g, 6.4 mmol) and 10% palladium activated on carbon (Pd/C) in EtOH/EtOAc = 60/60 (mL/mL) was vigorously stirred for 4 h at room temperature under a hydrogen atmosphere with a slightly positive pressure. The resulting mixture was filtered through a pad of Celite, and the filtrate was concentrated *in vacuo*. Purification of the residue by flash silica gel column chromatography (eluent: CH2Cl2/EtOAc = 10 : 1, *Rf* = 0.43) afforded **2b** as a colorless solid in 41% yield (2.7 g, 2.6 mmol), mp = 48 °C. IR (KBr) 3386, 3322, 2921, 2847, 1726, 1606, 1590, 1516, 1472, 1428, 1391, 1330, 1266, 1228, 1182, 1142, 1070, 1028, 998, 980, 945, 857, 814, 721 cm-1; 1H NMR (400 MHz, CDCl3)  = 6.81-6.70 (m, 6 H), 4.31-4.23 (m, 4 H), 3.98-3.94 (m, 8 H), 3.42 (dd, *J* = 5, 8 Hz, 1 H), 2.90-2.83 (m, 4 H), 2.43 (t, *J* = 8 Hz, 2 H), 2.07-2.00 (m, 1 H), 1.84-1.76 (m, 9 H), 1.46-1.26 (m, 64 H), 0.88 (t, *J* = 7 Hz, 12 H); 13C NMR (100 MHz, CDCl3)  = 175.5, 173.1, 149.12, 149.08, 147.89, 147.83, 130.2, 129.9, 121.0, 114.7, 114.6, 114.0, 69.34, 69.26, 65.6, 65.2, 53.7, 34.6, 31.9, 30.5, 29.6, 29.5, 29.4, 29.3, 26.0, 22.7, 14.1; Maldi-TOF-MAS (matrix, IAA): *m/z* 1036.18.

Synthesis of folic acid derivatives **1** was performed by amidation of *N*10-trifluoroacetylpteroic acid with the glutamate **2** (Scheme 1).

Synthesis of **1b**, representatively: An oven-dried, 100 mL, two-necked, round-bottomed flask, equipped with a rubber septum and magnetic stirring bar was charged with *N*10-trifluoroacetylpteric acid (0.67 g, 1.65 mmol) and DMF (5 mL) under an argon atmosphere. The resulting suspension was stirred at 40 °C until the entire solid dissolved. The dark red solution was added dropwise triethylamine (Et3N, 0.27 mL, 1.98 mmol) and isobutyl chloroformate (0.24 mL, 1.82 mmol), subsequently, at room temperature. The mixture was stirred at room temperature for 1 h before a solution of **2b** (1.89 g, 1.82 mmol) in dry THF (15 mL) was slowly added dropwise. The resulting mixture was stirred at 40 °C for 3 days, the solvent was removed *in vacuo*, and the residue was dissolved in CH2Cl2/EtOH/benzene (5/1/1). The solution was then filtered through a pad of Celite to remove a trace of solid residue. The filtrate was concentrated *in vacuo* and purified by flash silica gel column chromatography (eluent: CH2Cl2/ EtOH/benzene = 13 : 1 : 1) to give **1b** as a mesomorphic yellow waxy oil in a yield of 40%. *Rf* = 0.40 (CH2Cl2/ethanol/benzene = 13/1/1); IR (KBr) 3341, 3055, 2924, 2855, 1698, 1609, 1512, 1466, 1424, 1389, 1343, 1262, 1208, 1157, 1007, 857, 799, 721 cm-1; 1H NMR (400 MHz, CDCl3)  = 8.81 (s, 1 H), 7.87 (d, *J* = 8 Hz, 2 H), 7.42 (d, *J* = 8 Hz, 2 H), 6.81-6.69 (m, 6 H), 5.16 (s, 2 H), 4.77-4.72 (m, 1 H), 4.36-4.21 (m, 4 H), 3.99-3.93 (m, 8 H), 2.88 (t, *J* = 7 Hz, 2 H), 2.83 (t, *J* = 7 Hz, 2 H), 2.47-2.35 (m, 2 H), 2.26-2.20 (m, 1 H), 2.11-2.04 (m, 1 H), 1.80-1.76 (m, 8 H), 1.43-1.24 (m, 64 H), 0.86 (t, *J* = 7 Hz, 12 H); 13C NMR (75.5 MHz, CDCl3)  = 149.1, 149.0, 147.9, 147.8, and other peaks; 19F NMR (282 MHz, CDCl3)  = –67.4; Maldi-TOF MAS (matrix, IAA): *m/z* 1427.65.

2. Infrared spectra measurement of folic acid derivatives **1**

IR spectra of compounds **1a**, **1b**, and **1c** at room temperature were summarized in Table 1. The spectrum patterns were dependent on the liquid-crystalline phase structures. In the case of smectic liquid-crystalline **1a** and **1b**, the peak tops of the spectra corresponding to N-H stretchingappeared at 3351 and 3341 cm-1, respectively. However, for discotic liquid-crystalline **1c**, the peak tops were spirited to 3304 and 3251 cm-1. Similar peaks were also observed for a complex of **1b** and dodecane with lyotropic discotic liquid crystallinity in wide range of temperatures. The details for the liquid-crystalline phase behavior of the complex will be reported by the authors as an another communication.

**Table 1.** IR spectra of folic acid derivatives **1** at room temperature on KBr
